# Supplementary material for: Configuration-entropy effects on BiFeO3–BaTiO3 relaxor ferroelectric ceramics for high-density energy storage
Source: Royal Society of Chemistry journal article supplement (doi:10.1039/d4ta00921e), 2024-01-01
Supplement: d4ta00921e1.pdf [file d4ta00921e1.pdf]

**Table S1** Energy storage parameters of BF-, BF-BT-, BNT- and NN-based ceramic systems.

| Ceramics                                                                                                                                       | $W_{\text{rec}}$ (J/cm <sup>3</sup> ) | $\eta$ (%) | $E_b$ (kV/cm) | $\rho$ (J/kV·cm <sup>2</sup> ) | reference |
|------------------------------------------------------------------------------------------------------------------------------------------------|---------------------------------------|------------|---------------|--------------------------------|-----------|
| Bi <sub>0.83</sub> Sm <sub>0.17</sub> Fe <sub>0.95</sub> Sc <sub>0.05</sub> O <sub>3</sub>                                                     | 2.21                                  | 76         | 230           | $9.6 \times 10^{-3}$           | [41]      |
| □0.67Bi <sub>0.9</sub> Sm <sub>0.1</sub> FeO <sub>3</sub> -0.33BaTiO <sub>3</sub>                                                              | 2.8                                   | 55.8       | 200           | $14.0 \times 10^{-3}$          | [41]      |
| □0.56BiFeO <sub>3</sub> -0.3BaTiO <sub>3</sub> -0.14AgNbO <sub>3</sub>                                                                         | 2.11                                  | 84         | 195           | $10.8 \times 10^{-3}$          | [15]      |
| □0.75BiFeO <sub>3</sub> -□0.25Ba(Zn <sub>1/2</sub> Ta <sub>2/3</sub> )O <sub>3</sub>                                                           | 2.56                                  | 75         | 160           | $16.0 \times 10^{-3}$          | [41]      |
| □0.75BiNdFeO <sub>3</sub> -0.12SrBaTiO <sub>3</sub>                                                                                            | 1.74                                  | 74         | 150           | $16.6 \times 10^{-3}$          | [41]      |
| 0.62BiFeO <sub>3</sub> -0.3BaTiO <sub>3</sub> -0.08Nd(Zn <sub>0.5</sub> Zr <sub>0.5</sub> )O <sub>3</sub>                                      | 2.45                                  | 72         | 240           | $10.2 \times 10^{-3}$          | [45]      |
| 0.61BiFeO <sub>3</sub> -0.33(Ba <sub>0.8</sub> Sr <sub>0.2</sub> )TiO <sub>3</sub> -0.06La(Mg <sub>2/3</sub> Nb <sub>1/3</sub> )O <sub>3</sub> | 3.38                                  | 59         | 230           | $14.6 \times 10^{-3}$          | [42]      |
| 0.65BiFeO <sub>3</sub> -0.3BaTiO <sub>3</sub> -0.05Bi(Zn <sub>2/3</sub> Nb <sub>1/3</sub> )O <sub>3</sub>                                      | 2.1                                   | 55.7       | 180           | $11.6 \times 10^{-3}$          | [42]      |
| 0.56BiFeO <sub>3</sub> -0.3BaTiO <sub>3</sub> -0.14Ba(Zn <sub>1/3</sub> Nb <sub>2/3</sub> )O <sub>3</sub>                                      | 1.61                                  | ~65        | 180           | $8.9 \times 10^{-3}$           | [42]      |
| 0.61BiFeO <sub>3</sub> -0.33BaTiO <sub>3</sub> -0.06Ba(Mg <sub>1/3</sub> Nb <sub>2/3</sub> )O <sub>3</sub>                                     | 1.56                                  | 75         | 125           | $12.4 \times 10^{-3}$          | [42]      |
| 0.7(0.67BiFeO <sub>3</sub> -0.33BaTiO <sub>3</sub> )-0.3(Sr <sub>0.7</sub> Bi <sub>0.2</sub> )TiO <sub>3</sub>                                 | 2.4                                   | 90.4       | 180           | $13.3 \times 10^{-3}$          | [42]      |
| 0.75(Bi <sub>0.85</sub> Nd <sub>0.15</sub> )FeO <sub>3</sub> -0.25BaTiO <sub>3</sub>                                                           | 1.8                                   | 41.3       | 170           | $10.5 \times 10^{-3}$          | [42]      |
| □0.52Bi <sub>0.98</sub> La <sub>0.02</sub> FeO <sub>3</sub> -0.48BaTiO <sub>3</sub>                                                            | 1.22                                  | 58         | 140           | $8.71 \times 10^{-3}$          | [42]      |
| 0.65Bi <sub>0.5</sub> Na <sub>0.5</sub> TiO <sub>3</sub> -0.35BaTiO <sub>3</sub> -SrZr <sub>0.5</sub> Ti <sub>0.5</sub> O <sub>3</sub>         | 4.32                                  | 93.5       | 302           | $14.3 \times 10^{-3}$          | [43]      |
| □□0.8BNT-0.2SrNb <sub>0.5</sub> Al <sub>0.5</sub> O <sub>3</sub>                                                                               | 6.5                                   | 89         | 480           | $13.5 \times 10^{-3}$          | [44]      |
| □0.16BNT-0.8NaNbO <sub>3</sub> -0.04CaZrO <sub>3</sub>                                                                                         | 3.7                                   | 82.1       | 400           | $9.2 \times 10^{-3}$           | [44]      |
| (Na <sub>0.73</sub> Bi <sub>0.08</sub> Sm <sub>0.01</sub> )(Nb <sub>0.91</sub> Ta <sub>0.09</sub> )O <sub>3</sub>                              | 1.66                                  | 83.6       | 214           | $7.7 \times 10^{-3}$           | [45]      |
| 0.85(0.92NaNbO <sub>3</sub> -0.08Bi(Mg <sub>0.5</sub> Ti <sub>0.5</sub> )O <sub>3</sub> )-0.15SrTiO <sub>3</sub>                               | 6                                     | 81         | 300           | $20.0 \times 10^{-3}$          | [46]      |
| 0.2NaNbO <sub>3</sub> -0.8Sm(Mg <sub>0.5</sub> Zr <sub>0.5</sub> )O <sub>3</sub>                                                               | 4.3                                   | 85.6       | 560           | $7.6 \times 10^{-3}$           | [47]      |
| □0.85(0.7BiFeO <sub>3</sub> -0.3BaTiO <sub>3</sub> )-0.15NaNbO <sub>3</sub>                                                                    | 8.2                                   | 70         | 325           | $25.2 \times 10^{-3}$          | [14]      |
| □□Bi <sub>0.595</sub> Ba <sub>0.255</sub> Na <sub>0.15</sub> Fe <sub>0.595</sub> Ti <sub>0.255</sub> Ta <sub>0.15</sub> O <sub>3</sub>         | 8.7                                   | 65         | 350 (1Hz)     | $24.9 \times 10^{-3}$          | This work |
| Bi <sub>0.595</sub> Ba <sub>0.255</sub> Na <sub>0.15</sub> Fe <sub>0.595</sub> Ti <sub>0.255</sub> Ta <sub>0.15</sub> O <sub>3</sub>           | 9.6                                   | 77         | 350 (10 Hz)   | $27.4 \times 10^{-3}$          | This work |
| □Bi <sub>0.56</sub> Ba <sub>0.24</sub> Na <sub>0.2</sub> Fe <sub>0.56</sub> Ti <sub>0.24</sub> Ta <sub>0.2</sub> O <sub>3</sub>                | 8.7                                   | 66         | 550 (1 Hz)    | $15.8 \times 10^{-3}$          | This work |
| □Bi <sub>0.56</sub> Ba <sub>0.24</sub> Na <sub>0.2</sub> Fe <sub>0.56</sub> Ti <sub>0.24</sub> Ta <sub>0.2</sub> O <sub>3</sub>                | 10.3                                  | 68         | 550 (10 Hz)   | $18.7 \times 10^{-3}$          | This work |

**Table S2** □ Recoverable energy storage intensity ( $\rho$ ). The calculated  $\rho$  values were obtained using the relation  $\rho = W_{\text{rec}}/\Delta E$ , based on Fig. 5(b,c,e,f).

| $x$ - NT | $W_{\text{rec}}$ (J/cm <sup>3</sup> ) | $\Delta E$ (kV/cm) | $\rho$ (J/kV·cm <sup>2</sup> ) | Measuring frequency |
|----------|---------------------------------------|--------------------|--------------------------------|---------------------|
| 0        | 2                                     | 175                | $11.4 \times 10^{-3}$          | 1 Hz                |
| 0.05     | 5.5                                   | 275                | $20.0 \times 10^{-3}$          | 1 Hz                |
| 0.10     | 7.4                                   | 350                | $21.1 \times 10^{-3}$          | 1 Hz                |
| □0.15    | 8.7                                   | 350                | $24.9 \times 10^{-3}$          | 1 Hz                |
| 0.15     | 9.6                                   | 350                | $27.4 \times 10^{-3}$          | 10 Hz               |
| 0.20     | 8.7                                   | 550                | $15.8 \times 10^{-3}$          | 1 Hz                |
| 0.20     | 10.3                                  | 550                | $18.7 \times 10^{-3}$          | 10 Hz               |
| 0.30     | 4.6                                   | 425                | $10.8 \times 10^{-3}$          | 1 Hz                |

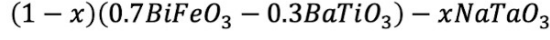

$$S_{config} = -R \left[ \sum_{(A\text{-site cations})} x_i \ln(x_i) + \sum_{(B\text{-site cations})} x_j \ln(x_j) + \sum_{(anions)} x_k \ln(x_k) \right]$$

at  $x = 0$

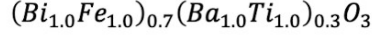

$$S_{config} = -R[2 * 0.7 \ln(0.7) + 2 * 0.3 \ln(0.3) + 1.0 \ln(1.0)]$$

$$S_{config} = -R[2 * 0.7(-0.356) + 2 * 0.3(-1.203) + 0]$$

$$S_{config} = R[0.498 + 0.721] = 1.21R$$

at  $x = 0.30$

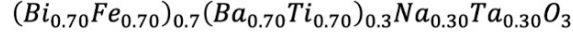

$$S_{config} = -R[2 * 0.49 \ln(0.49) + 2 * 0.21 \ln(0.21) + 2 * 0.30 \ln(0.30) + 1.0 \ln(1.0)]$$

$$S_{config} = -R[2 * 0.49(-0.713) + 2 * 0.21(-1.560) + 2 * 0.30(1.203) + 0]$$

$$S_{config} = R[0.698 + 0.655 + 0.721] = 2.07R$$

**Figure S1** The calculation process of configuration entropy.

### Side view

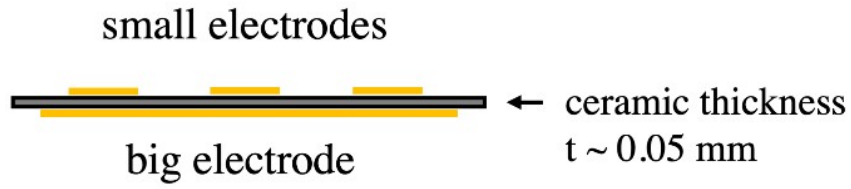

### Top view

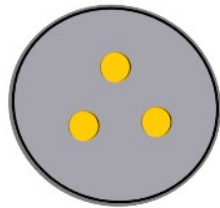

top electrodes  
1 mm diameter

### Bottom view

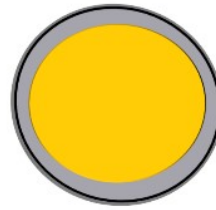

bottom electrode  
5 mm diameter

### Actual sample

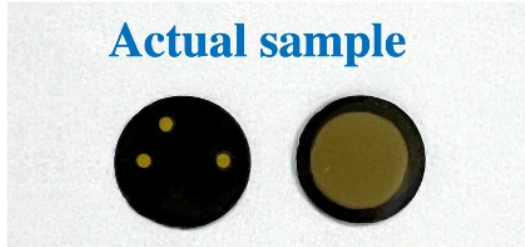

**Figure S2** Electrode's configuration for the P-E loop experiment.

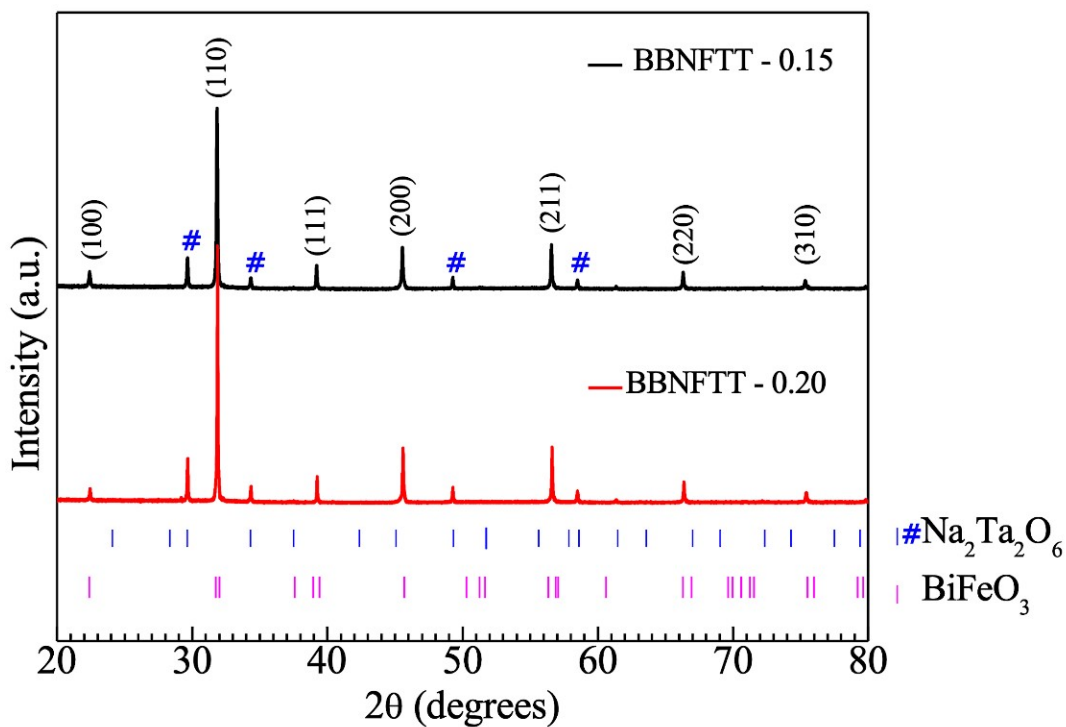

**Figure S3** Identification of the cubic  $Fd-3m$   $\text{Na}_2\text{Ta}_2\text{O}_6$  phase in the  $\text{NaTaO}_3$ -contained specimens.

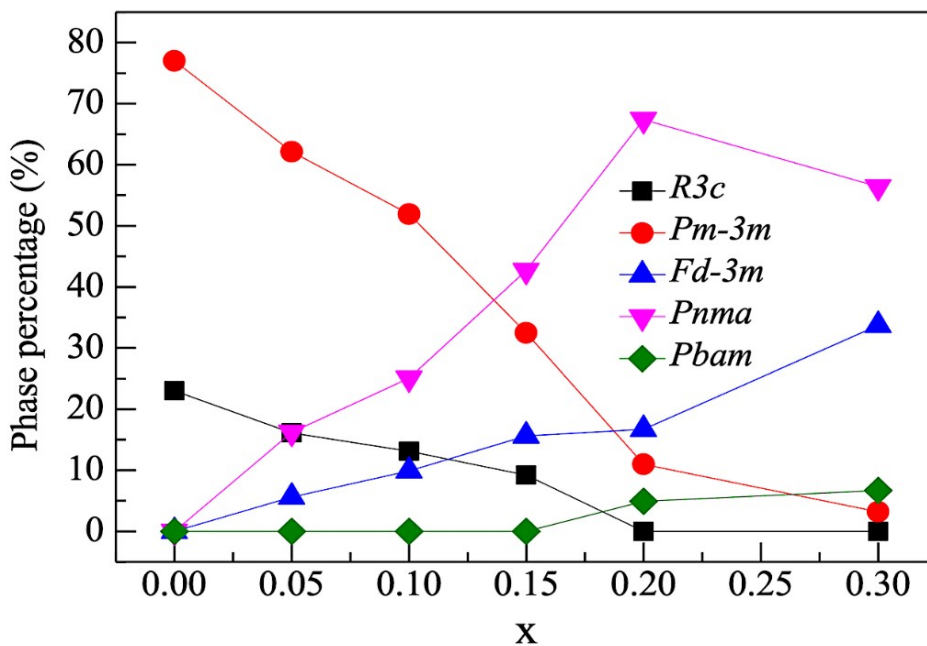

**Figure S4** Variations of different phase percentages (wt.%) of BBNFTT-x ceramics.

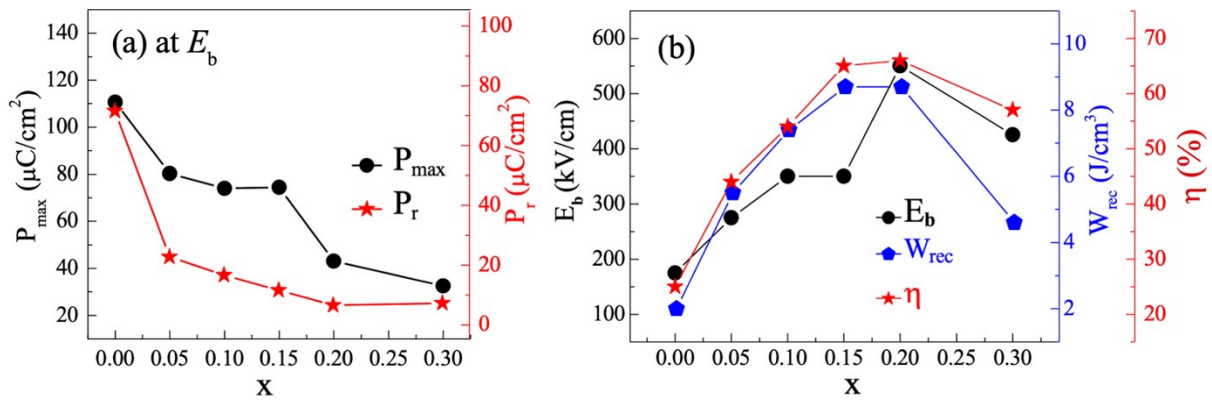

**Figure S5** (a)  $P_{max}$  and  $P_r$ , measured at  $E_b$  and (b)  $E_b$ ,  $W_{rec}$ , and  $\eta$  vs.  $x$  of BBNFTT- $x$  ceramics.

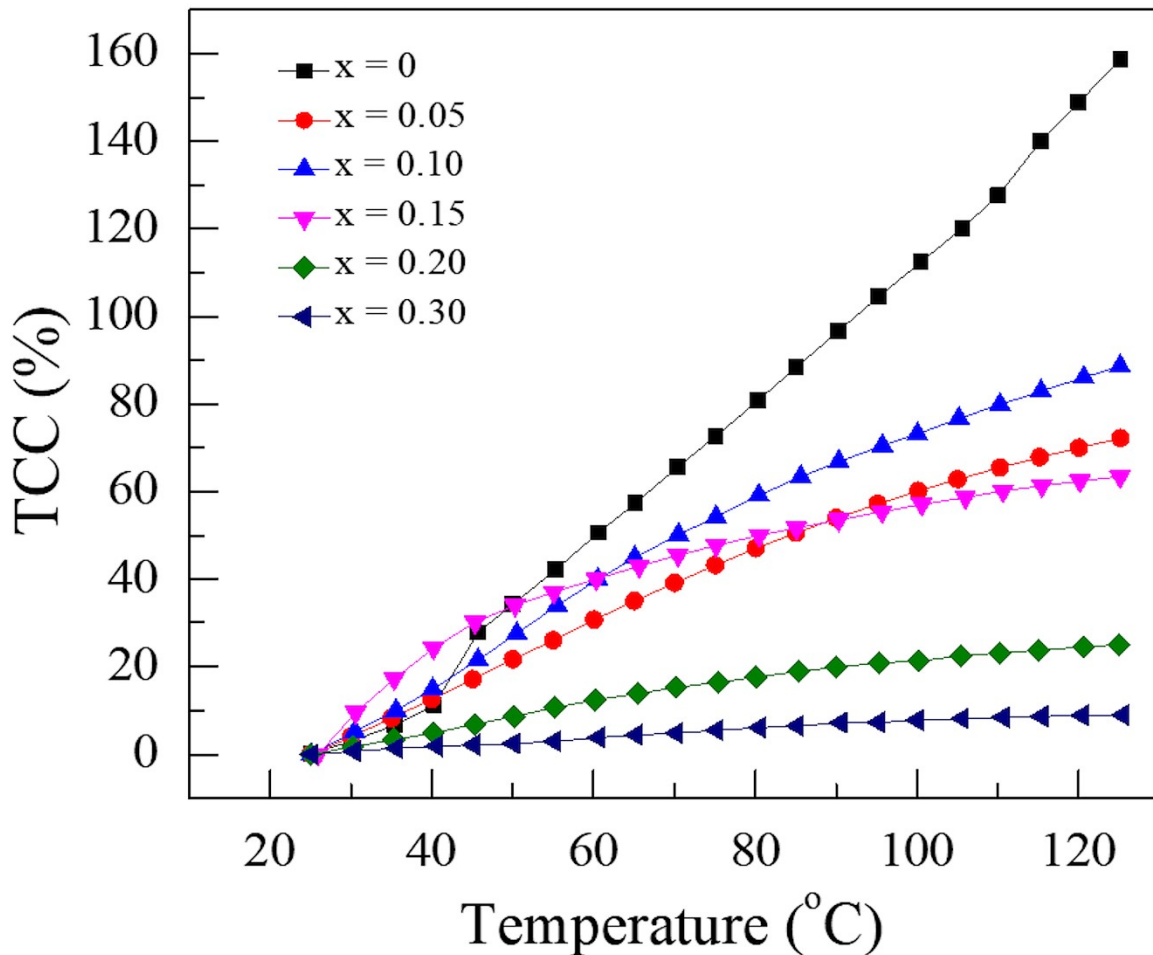

**Figure S6** Temperature coefficients of capacitance (TCC) for BBNFTT- $x$  from  $x = 0$  to  $x = 0.30$  for measuring frequency of 1 kHz.

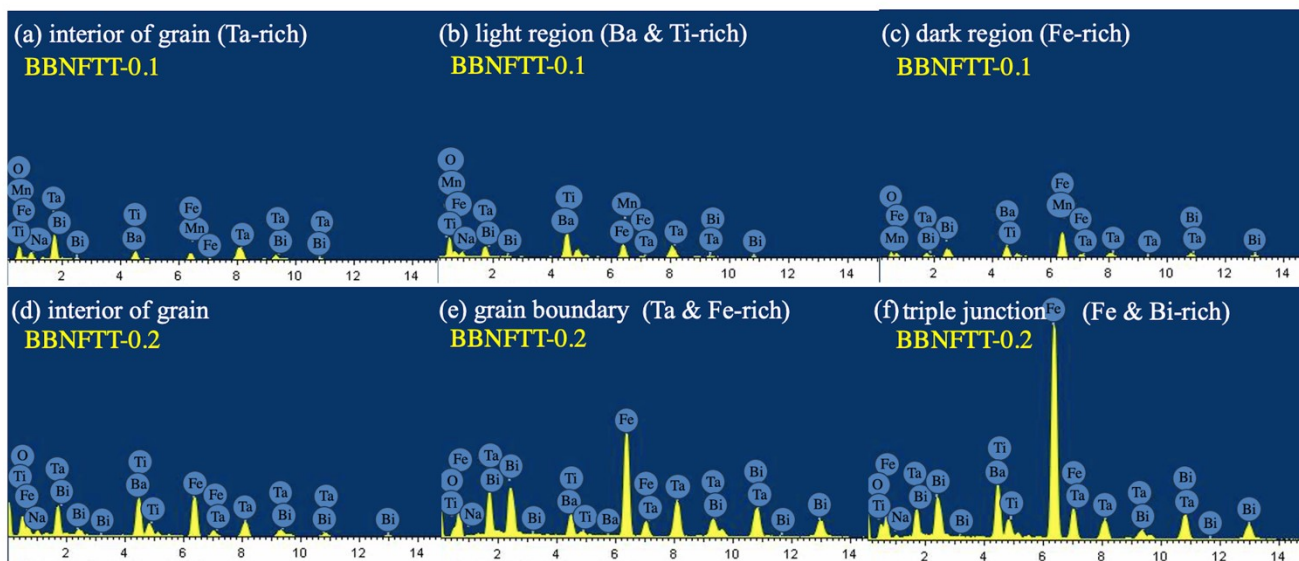

| Element | (a)   | (b)   | (c)   | (d)   | (e)   | (f)   | Unit        |
|---------|-------|-------|-------|-------|-------|-------|-------------|
| O       | 58.16 | 57.37 | 20.18 | 34.29 | 10.84 | 11.70 | atomic<br>% |
| Na      | 0.68  | 0.31  | 0.10  | 3.74  | 0.38  | 0.95  |             |
| Ti      | 9.47  | 11.14 | 7.10  | 10.62 | 5.87  | 5.46  |             |
| Fe      | 10.01 | 10.35 | 56.78 | 23.79 | 44.72 | 56.84 |             |
| Ba      | 3.21  | 14.80 | 10.63 | 14.33 | 3.27  | 9.50  |             |
| Ta      | 17.32 | 4.81  | 3.80  | 10.03 | 17.64 | 5.41  |             |
| Bi      | 1.15  | 1.22  | 1.42  | 3.20  | 17.28 | 10.14 |             |

**Figure S7** EDX spectra of (a-c) BBNFTT-0.1 and (d-f) BBNFTT-0.2.
